# Supplementary material for: Hydrogen Sulfide-to-Thiosulfate Ratio Associated with Blood Pressure Abnormalities in Pediatric CKD
Source: MDPI journal article supplement (doi:10.3390/jpm12081241), 2022-07-29
Supplement: s1 [file s1]

**Table S1.** Plasma H<sub>2</sub>S, thiosulfate and H<sub>2</sub>S-to-thiosulfate ratio in CKD children.

|           |    | H <sub>2</sub> S $\mu$ M/L | Thiosulfate $\mu$ M/L | HTR $\mu$ M/ $\mu$ M |
|-----------|----|----------------------------|-----------------------|----------------------|
| CKD Stage | n  |                            |                       |                      |
| Stage 1   | 35 | 16.8 $\pm$ 10.5            | 1.18 $\pm$ 1.6        | 49.2 $\pm$ 67.5      |
| Stage 2   | 17 | 14.3 $\pm$ 5.3             | 0.9 $\pm$ 1.21        | 44.4 $\pm$ 42.1      |
| Stage 3   | 3  | 8.8 $\pm$ 1.04             | 0.76 $\pm$ 0.9        | 39.1 $\pm$ 45.7      |
| Stage 4   | 1  | 37.8                       | 0.51                  | 74.2                 |

Data are mean  $\pm$  SD or actual number. HTR = H<sub>2</sub>S-to-thiosulfate ratio.
